# Supplementary material for: The Cost-Effectiveness of Alogliptin Versus Sulfonylurea as Add-on Therapy to Metformin in Patients with Uncontrolled Type 2 Diabetes Mellitus
Source: Springer Nature journal article supplement (doi:10.1007/s13300-016-0206-7), 2016-10-27
Supplement: MOESM1 [file 10991134]

## List of Supplementary Tables

|                                                                        |    |
|------------------------------------------------------------------------|----|
| <b>Table S1:</b> Treatment and consumable unit costs.....              | 2  |
| <b>Table S2:</b> Annual treatment costs implemented into the CDM ..... | 3  |
| <b>Table S3:</b> Management costs implemented within the CDM .....     | 4  |
| <b>Table S4:</b> Direct costs implemented within the CDM.....          | 5  |
| <b>Table S5:</b> Baseline utilities implemented within the CDM.....    | 6  |
| <b>Table S6:</b> NPH Insulin costs .....                               | 7  |
| <b>Table S7:</b> Lancet cost.....                                      | 8  |
| <b>Table S8:</b> SMBG strip cost .....                                 | 10 |

**Table S1: Treatment and consumable unit costs**

|                                                                                                                                                                                                                                                                                                                                 | Unit size | Quantity in Packet | Packet cost | Unit Cost | Source                                  |
|---------------------------------------------------------------------------------------------------------------------------------------------------------------------------------------------------------------------------------------------------------------------------------------------------------------------------------|-----------|--------------------|-------------|-----------|-----------------------------------------|
| <b>Treatments</b>                                                                                                                                                                                                                                                                                                               |           |                    |             |           |                                         |
| - Metformin                                                                                                                                                                                                                                                                                                                     | 500mg     | 28                 | £1.27       | £0.05     | MIMS - Metformin [1]                    |
| - Glipizide                                                                                                                                                                                                                                                                                                                     | 5mg       | 28                 | £3.23       | £0.12     | MIMS - Glipizide [1]                    |
| - Alogliptin (12.5mg)                                                                                                                                                                                                                                                                                                           | 12.5mg    | 28                 | £26.60      | £0.95     | MIMS – Vipidia® [1]                     |
| - Alogliptin (25mg)                                                                                                                                                                                                                                                                                                             | 25mg      | 28                 | £26.60      | £0.95     | MIMS – Vipidia® [1]                     |
| - NPH Insulin                                                                                                                                                                                                                                                                                                                   | 1 unit    | #                  | #           | £0.02     | MIMS - Intermediate acting insulins [1] |
| <b>Consumables</b>                                                                                                                                                                                                                                                                                                              |           |                    |             |           |                                         |
| - Lancets                                                                                                                                                                                                                                                                                                                       | 1 lancet  | #                  | #           | £0.04     | MIMS - Blood lancets [1]                |
| - SMBG Strips                                                                                                                                                                                                                                                                                                                   | 1 strip   | #                  | #           | £0.29     | MIMS - Blood glucose tests [1]          |
| - Needles                                                                                                                                                                                                                                                                                                                       | 1 needle  | 1                  | £0.37       | £0.037    | MIMS - Needles, hypodermic [1]          |
| <p><b>Abbreviations:</b> SMBG, Self-monitoring of blood glucose; NPH, Neutral Protamine Hagedorn.</p> <p><b>Notes:</b> #, Multiple prescription options available, calculated by averaging unit costs of all relevant values. Contributing treatments/consumables outlined in Table S6, Table S7 and Table S8 respectively.</p> |           |                    |             |           |                                         |

**Table S2: Annual treatment costs implemented into the CDM**

|                                                                                                                                                                                                                                                                                                                          | Daily dose/freq | Source              | Daily Cost | Annual Cost | Total Cost |
|--------------------------------------------------------------------------------------------------------------------------------------------------------------------------------------------------------------------------------------------------------------------------------------------------------------------------|-----------------|---------------------|------------|-------------|------------|
| <b>MET+SU</b>                                                                                                                                                                                                                                                                                                            |                 |                     |            |             |            |
| - Metformin                                                                                                                                                                                                                                                                                                              | 2000mg          | NICE (Table 81) [2] | £0.18      | £66.22      | £159.43    |
| - Glipizide                                                                                                                                                                                                                                                                                                              | 5mg             | ENDURE [3]*         | £0.12      | £42.11      |            |
| - SMBG strips                                                                                                                                                                                                                                                                                                            | 0.428           | NICE (Table 65) [2] | £0.12      | £44.74      |            |
| - Lancets                                                                                                                                                                                                                                                                                                                | 0.428           | NICE (Table 65) [2] | £0.02      | £6.37       |            |
| - Needles                                                                                                                                                                                                                                                                                                                | 0               | NICE (Table 65) [2] | £0.00      | £0.00       |            |
| <b>MET+ALO (12.5mg)</b>                                                                                                                                                                                                                                                                                                  |                 |                     |            |             |            |
| - Metformin                                                                                                                                                                                                                                                                                                              | 2000mg          | NICE (Table 81) [2] | £0.18      | £66.22      | £412.97    |
| - Alogliptin                                                                                                                                                                                                                                                                                                             | 12.5mg          | ENDURE [3]          | £0.95      | £346.75     |            |
| - SMBG strips                                                                                                                                                                                                                                                                                                            | 0               | NICE (Table 65) [2] | £0.00      | £0.00       |            |
| - Lancets                                                                                                                                                                                                                                                                                                                | 0               | NICE (Table 65) [2] | £0.00      | £0.00       |            |
| - Needles                                                                                                                                                                                                                                                                                                                | 0               | NICE (Table 65) [2] | £0.00      | £0.00       |            |
| <b>MET+ALO (25mg)</b>                                                                                                                                                                                                                                                                                                    |                 |                     |            |             |            |
| - Metformin                                                                                                                                                                                                                                                                                                              | 2000mg          | NICE (Table 81) [2] | £0.18      | £66.22      | £412.97    |
| - Alogliptin                                                                                                                                                                                                                                                                                                             | 25mg            | ENDURE [3]          | £0.95      | £346.75     |            |
| - SMBG strips                                                                                                                                                                                                                                                                                                            | 0               | NICE (Table 65) [2] | £0.00      | £0.00       |            |
| - Lancets                                                                                                                                                                                                                                                                                                                | 0               | NICE (Table 65) [2] | £0.00      | £0.00       |            |
| - Needles                                                                                                                                                                                                                                                                                                                | 0               | NICE (Table 65) [2] | £0.00      | £0.00       |            |
| <b>MET+NPH</b>                                                                                                                                                                                                                                                                                                           |                 |                     |            |             |            |
| - Metformin                                                                                                                                                                                                                                                                                                              | 2000mg          | NICE (Table 81) [2] | £0.18      | £66.22      | £610.03    |
| - NPH Insulin                                                                                                                                                                                                                                                                                                            | 47.7 units      | NICE (Table 81) [2] | £0.95      | £346.75     |            |
| - SMBG strips                                                                                                                                                                                                                                                                                                            | 2               | NICE (Table 65) [2] | £0.00      | £0.00       |            |
| - Lancets                                                                                                                                                                                                                                                                                                                | 2               | NICE (Table 65) [2] | £0.00      | £0.00       |            |
| - Needles                                                                                                                                                                                                                                                                                                                | 1               | NICE (Table 65) [2] | £0.00      | £0.00       |            |
| <p><b>Abbreviations:</b> ALO, alogliptin; freq., frequency; MET, Metformin; SMBG, Self-monitoring of blood glucose; NPH, Neutral Protamine Hagedorn; SU, sulphonylurea.</p> <p><b>Notes:</b> *, Assumed value based on "95.0% of patients in the glipizide group were receiving 5mg per day at the end of the study"</p> |                 |                     |            |             |            |

**Table S3: Management costs implemented within the CDM**

|                                                                                                                                      | Annual Cost (£) | Source                           |
|--------------------------------------------------------------------------------------------------------------------------------------|-----------------|----------------------------------|
| <b>Management costs</b>                                                                                                              |                 |                                  |
| Statins                                                                                                                              | £12.36          | MIMS (10mg/day Atorvastatin) [1] |
| Aspirin                                                                                                                              | £40.20          | MIMS (300mg/day Aspirin) [1]     |
| ACE                                                                                                                                  | £10.32          | MIMS (10mg/day Lisinopril) [1]   |
| Screening for MA                                                                                                                     | £0.00           | -                                |
| Screening for GRP                                                                                                                    | £0.00           | -                                |
| Stopping ACEs due to SAEs                                                                                                            | £0.00           | -                                |
| Eye screening                                                                                                                        | £0.00           | -                                |
| Foot screening program                                                                                                               | £0.00           | -                                |
| Non-standard ulcer treatment                                                                                                         | £0.00           | -                                |
| Anti-depression treatment                                                                                                            | £11.76          | MIMS (20mg/day Fluoxetine) [1]   |
| Screening for depression                                                                                                             | £0.00           | -                                |
| <b>Abbreviations:</b> ACE, angiotensin-converting-enzyme; MA, microalbuminuria; GRP, gross proteinuria; SAE, Serious adverse events. |                 |                                  |

**Table S4: Direct costs implemented within the CDM**

|                                                                                                                                                                                                                                                                                                                                                                                                                                                                                 | Annual Cost (£)<br>First (Subsequent) | Source                    |
|---------------------------------------------------------------------------------------------------------------------------------------------------------------------------------------------------------------------------------------------------------------------------------------------------------------------------------------------------------------------------------------------------------------------------------------------------------------------------------|---------------------------------------|---------------------------|
| <b>Direct costs of CVD complications</b>                                                                                                                                                                                                                                                                                                                                                                                                                                        |                                       |                           |
| MI*                                                                                                                                                                                                                                                                                                                                                                                                                                                                             | £6,508 (£1,177)                       | Alva et al. [4]           |
| Angina*                                                                                                                                                                                                                                                                                                                                                                                                                                                                         | £9,964 (£1,240)                       |                           |
| HF*                                                                                                                                                                                                                                                                                                                                                                                                                                                                             | £3,255 (£1,503)                       |                           |
| Stroke*                                                                                                                                                                                                                                                                                                                                                                                                                                                                         | £6,942 (£1,148)                       |                           |
| Stroke death within 30 days*                                                                                                                                                                                                                                                                                                                                                                                                                                                    | £4,034                                |                           |
| PVD*                                                                                                                                                                                                                                                                                                                                                                                                                                                                            | £2,874 (£2,874)                       | Currie et al. [5]         |
| <b>Direct costs of renal complications</b>                                                                                                                                                                                                                                                                                                                                                                                                                                      |                                       |                           |
| HD*                                                                                                                                                                                                                                                                                                                                                                                                                                                                             | £26,236 (£26,236)                     | Kerr et al. [6]           |
| PD*                                                                                                                                                                                                                                                                                                                                                                                                                                                                             | £21,909 (£21,909)                     |                           |
| RT*                                                                                                                                                                                                                                                                                                                                                                                                                                                                             | £38,151 (£7,986)                      |                           |
| <b>Direct costs of acute events</b>                                                                                                                                                                                                                                                                                                                                                                                                                                             |                                       |                           |
| Major hypo*                                                                                                                                                                                                                                                                                                                                                                                                                                                                     | £278.59                               | Farmer et al. [7]         |
| Minor hypo*                                                                                                                                                                                                                                                                                                                                                                                                                                                                     | £0.00                                 | Assumption                |
| Ketoacidosis event                                                                                                                                                                                                                                                                                                                                                                                                                                                              | £0.00                                 | -                         |
| Lactic acid event                                                                                                                                                                                                                                                                                                                                                                                                                                                               | £0.00                                 | -                         |
| Oedema onset (adverse event)                                                                                                                                                                                                                                                                                                                                                                                                                                                    | £0.00                                 | -                         |
| Oedema follow up (adverse event)                                                                                                                                                                                                                                                                                                                                                                                                                                                | £0.00                                 | -                         |
| <b>Direct costs of eye disease</b>                                                                                                                                                                                                                                                                                                                                                                                                                                              |                                       |                           |
| Laser treatment*                                                                                                                                                                                                                                                                                                                                                                                                                                                                | £829.00                               | UKPDS study group 40. [8] |
| Cataract operation*                                                                                                                                                                                                                                                                                                                                                                                                                                                             | £714.00                               | Alva et al. [4]           |
| Following cataract operation*                                                                                                                                                                                                                                                                                                                                                                                                                                                   | £688.00                               |                           |
| Blindness - year of onset*                                                                                                                                                                                                                                                                                                                                                                                                                                                      | £1,382 (£462)                         |                           |
| <b>Direct costs of neuropathy/foot ulcer/amputation</b>                                                                                                                                                                                                                                                                                                                                                                                                                         |                                       |                           |
| Neuropathy*                                                                                                                                                                                                                                                                                                                                                                                                                                                                     | £1,170 (£1,170)                       | Currie et al. [5]         |
| Amputation (event based)*                                                                                                                                                                                                                                                                                                                                                                                                                                                       | £9,739                                | Alva et al. [4]           |
| Amputation prosthesis (event based)*                                                                                                                                                                                                                                                                                                                                                                                                                                            | £686                                  | Currie et al. [5]         |
| Gangrene treatment                                                                                                                                                                                                                                                                                                                                                                                                                                                              | £3,157                                | Ghatnekar et al.[9]       |
| After healed ulcer                                                                                                                                                                                                                                                                                                                                                                                                                                                              | £0.00                                 | Assumption                |
| Infected ulcer                                                                                                                                                                                                                                                                                                                                                                                                                                                                  | £1,810                                | Ghatnekar et al. [9]      |
| Standard uninfected ulcer                                                                                                                                                                                                                                                                                                                                                                                                                                                       | £1,775                                |                           |
| Healed ulcer history of amputation                                                                                                                                                                                                                                                                                                                                                                                                                                              | £0.00                                 | Assumption                |
| <p><b>Abbreviations:</b> MI, myocardial infarction; HF, heart failure; PVD, peripheral vascular disease; HD, hemodialysis; PD, peritoneal dialysis; RT, renal transplant; hypo, hypoglycemia.</p> <p><b>Notes:</b> *, Costs (where appropriate) have been inflated to 2015 prices (latest available) using the hospital and community health services (HCHS) index (2015: 293.10) [9]; Cells with a single value imply the same cost value is used for year 1 and years 2+.</p> |                                       |                           |

**Table S5: Baseline utilities implemented within the CDM**

|                                                                                                                                                                                                                                                                                                                                                                                                                                                                                                                                                                                        | Utility | Source                   |
|----------------------------------------------------------------------------------------------------------------------------------------------------------------------------------------------------------------------------------------------------------------------------------------------------------------------------------------------------------------------------------------------------------------------------------------------------------------------------------------------------------------------------------------------------------------------------------------|---------|--------------------------|
| <b>Baseline utilities</b>                                                                                                                                                                                                                                                                                                                                                                                                                                                                                                                                                              |         |                          |
| T2 no complications                                                                                                                                                                                                                                                                                                                                                                                                                                                                                                                                                                    | 0.814   | Clarke et al. [10]       |
| MI event disutility                                                                                                                                                                                                                                                                                                                                                                                                                                                                                                                                                                    | -0.129  |                          |
| Post MI                                                                                                                                                                                                                                                                                                                                                                                                                                                                                                                                                                                | 0.736   |                          |
| Angina                                                                                                                                                                                                                                                                                                                                                                                                                                                                                                                                                                                 | 0.682   |                          |
| HF                                                                                                                                                                                                                                                                                                                                                                                                                                                                                                                                                                                     | 0.633   |                          |
| Stroke event disutility                                                                                                                                                                                                                                                                                                                                                                                                                                                                                                                                                                | -0.181  |                          |
| Post stroke                                                                                                                                                                                                                                                                                                                                                                                                                                                                                                                                                                            | 0.545   |                          |
| PVD                                                                                                                                                                                                                                                                                                                                                                                                                                                                                                                                                                                    | 0.570   | Tengs & Wallace.[11]     |
| MA                                                                                                                                                                                                                                                                                                                                                                                                                                                                                                                                                                                     | 0.814   | Assumption*              |
| GRP                                                                                                                                                                                                                                                                                                                                                                                                                                                                                                                                                                                    | 0.814   | Assumption*              |
| HD                                                                                                                                                                                                                                                                                                                                                                                                                                                                                                                                                                                     | 0.604   | Wasserfallen et al. [12] |
| PD                                                                                                                                                                                                                                                                                                                                                                                                                                                                                                                                                                                     | 0.612   |                          |
| RT                                                                                                                                                                                                                                                                                                                                                                                                                                                                                                                                                                                     | 0.750   | Tengs & Wallace. [11]    |
| BDR                                                                                                                                                                                                                                                                                                                                                                                                                                                                                                                                                                                    | 0.790   | Sharma et al. [13]       |
| PDR                                                                                                                                                                                                                                                                                                                                                                                                                                                                                                                                                                                    | 0.790   |                          |
| ME                                                                                                                                                                                                                                                                                                                                                                                                                                                                                                                                                                                     | 0.790   |                          |
| SVL                                                                                                                                                                                                                                                                                                                                                                                                                                                                                                                                                                                    | 0.670   | Lloyd et al. [14]        |
| Neuropathy                                                                                                                                                                                                                                                                                                                                                                                                                                                                                                                                                                             | 0.630   |                          |
| Cataract                                                                                                                                                                                                                                                                                                                                                                                                                                                                                                                                                                               | 0.620   | Hopkins et al. [15]      |
| Active ulcer                                                                                                                                                                                                                                                                                                                                                                                                                                                                                                                                                                           | 0.75    | Redekop et al. [16]      |
| Healed ulcer                                                                                                                                                                                                                                                                                                                                                                                                                                                                                                                                                                           | 0.814   | Assumption*              |
| Amputation event disutility                                                                                                                                                                                                                                                                                                                                                                                                                                                                                                                                                            | -0.538  | Clarke et al. [10]       |
| Post amputation                                                                                                                                                                                                                                                                                                                                                                                                                                                                                                                                                                        | 0.402   | Clarke et al. [10]       |
| Major hypo event disutility                                                                                                                                                                                                                                                                                                                                                                                                                                                                                                                                                            | -0.012  | Currie et al. [17]       |
| Minor hypo event disutility                                                                                                                                                                                                                                                                                                                                                                                                                                                                                                                                                            | -0.004  |                          |
| Keto                                                                                                                                                                                                                                                                                                                                                                                                                                                                                                                                                                                   | -       | Not implemented          |
| LA                                                                                                                                                                                                                                                                                                                                                                                                                                                                                                                                                                                     | -       | Not implemented          |
| Fear of Hypoglycemic                                                                                                                                                                                                                                                                                                                                                                                                                                                                                                                                                                   | -       | Not implemented          |
| Oedema                                                                                                                                                                                                                                                                                                                                                                                                                                                                                                                                                                                 | -       | Not implemented          |
| Post edema                                                                                                                                                                                                                                                                                                                                                                                                                                                                                                                                                                             | 0.814   | Assumption*              |
| Untreated depression                                                                                                                                                                                                                                                                                                                                                                                                                                                                                                                                                                   | 0.606   | Goldney et al. [18]      |
| Treated depression                                                                                                                                                                                                                                                                                                                                                                                                                                                                                                                                                                     | 0.814   | Assumption*              |
| <p><b>Abbreviations:</b> T2, Type 2; MI, myocardial infarction; HF, heart failure; PVD, peripheral vascular disease; MA, microalbuminuria; GRP, gross proteinuria; HD, hemodialysis; PD, peritoneal dialysis; RT, renal transplant; BDR, background diabetic retinopathy; PDR, proliferative diabetic retinopathy; ME, macular edema; SVL, severe vision loss; Hypo, hypoglycemia; LA, Lactic acid.</p> <p><b>Notes:</b> * No data available. Utility assumed to be equal to a type 2 diabetic with no complications. Utility values range from [0, 1]; Disutility values [-1, 0].</p> |         |                          |

**Table S6: NPH Insulin costs**

| <b>NPH drug name</b>                                           | <b>MIMS cost information [1]<br/>based on per 100 IU/ml</b> | <b>Cost per ml</b> | <b>Cost per IU/ml (÷ 100)</b> |
|----------------------------------------------------------------|-------------------------------------------------------------|--------------------|-------------------------------|
| Humulin I                                                      | 5 x 3ml KwikPen=£21.70                                      | £1.45              | £0.01                         |
|                                                                | 5 x 3ml cartridge=£19.08                                    | £1.27              | £0.01                         |
|                                                                | 1 x 10ml vial=£15.68.                                       | £1.57              | £0.02                         |
| Hypurin Bovine Isophane                                        | 5 x 3ml cartridge=£41.58                                    | £2.77              | £0.03                         |
|                                                                | 1 x 10ml vial=£27.72                                        | £2.77              | £0.03                         |
| Hypurin Porcine Isophane                                       | 5 x 3ml cartridge=£37.80                                    | £2.52              | £0.03                         |
|                                                                | 1 x 10ml vial=£25.20                                        | £2.52              | £0.03                         |
| Insulatard                                                     | 5 x 3ml Penfill cartridges=£22.90                           | £1.53              | £0.02                         |
|                                                                | 5 x 3ml InnoLet pre-filled delivery device=£20.40           | £1.36              | £0.01                         |
|                                                                | 1 x 10ml vial=£7.48.                                        | £0.75              | £0.01                         |
| Insuman Basal                                                  | 1 x 5ml vial=£5.61.                                         | £1.12              | £0.01                         |
|                                                                | 5 x 3ml cartridges=£17.50                                   | £1.17              | £0.01                         |
|                                                                | 5 x 3ml SoloStar pre-filled pen=£19.80                      | £1.32              | £0.01                         |
| <b>Average cost per iu/ml (unit):</b>                          |                                                             |                    | <b>£0.02</b>                  |
| <b>Abbreviations:</b> NPH, Neutral Protamine Hagedorn insulin. |                                                             |                    |                               |

**Table S7: Lancet cost**

| Lancet name                    | MIMS [1] cost information                 | Cost per lancet |
|--------------------------------|-------------------------------------------|-----------------|
| Acti-Lance                     | 2.0mm/17 gauge, 100=£5.49; 200=£10.41.    | £0.05           |
|                                | 1.8mm/23 gauge, 100=£5.49; 200=£9.88.     |                 |
|                                | 1.5mm/28 gauge, 100=£5.49; 200=£9.88.     |                 |
| Advocate                       | 0.31mm/30 gauge, 100=£2.95.               | £0.03           |
| AgaMatrix Ultra-Thin           | 0.35mm/28 gauge, 200=£5.43.               | £0.03           |
|                                | 0.20mm/33 gauge, 200=£7.17                |                 |
| Apollo Safety Lancets          | 2.4mm/21 gauge, 100=£5.99.                | £0.06           |
|                                | 2.4mm/23 gauge, 100=£5.99.                |                 |
|                                | 1.8mm/26 gauge, 100=£5.99.                |                 |
|                                | 1.8mm/28 gauge, 100=£5.99.                |                 |
| BD Micro-Fine + Lancet         | 0.20mm/33G, 100=£3.16.                    | £0.05           |
|                                | 0.30mm/30G, 200=£6.13.                    |                 |
| BG Star Lancet                 | 100=£3.65.                                | £0.04           |
| CareSens Lancets               | 0.31mm/30 gauge, 100=£2.95.               | £0.03           |
|                                | 0.36mm/28 gauge, 100=£2.95.               |                 |
| Dario Lancets                  | 100=£3.45.                                | £0.03           |
| Fastclix                       | 204=£9.92.                                | £0.05           |
| Freestyle Lancet               | 200=£7.36                                 | £0.04           |
| Glucodex Lancets               | 100=£3.60                                 | £0.04           |
| Glucojet Lancets Plus          | 100=£3.73                                 | £0.03           |
|                                | 200=£5.50                                 |                 |
| GlucoRx Safety Lancets         | 1.6mm/30 gauge, 100=£5.50.                | £0.06           |
|                                | 1.8mm/28 gauge, 100=£5.50.                |                 |
|                                | 1.8mm/26 gauge, 100=£5.50.                |                 |
|                                | 2.2mm/23 gauge, 100=£5.50                 |                 |
| Glucozen Lancets               | 200=£4.99                                 | £0.02           |
| Greenlan Lancets               | 100=£3.00                                 | £0.03           |
|                                | 200=£6.00                                 |                 |
| IME-DC Lancets                 | 100=£3.00                                 | £0.03           |
| Medisafe Solo                  | 0.5mm/29 gauge, 200=£10.75.               | £0.05           |
| MediTouch Lancets              | 100=£3.60                                 | £0.04           |
| Medlance Plus                  | 2.0mm/0.8mm blade, 100=£5.39; 200=£10.25. | £0.05           |
|                                | 1.8mm/21 gauge, 100=£4.81; 200=£9.57.     |                 |
|                                | 2.4mm/21 gauge, 100=£4.81; 200=£9.57.     |                 |
|                                | 1.5mm/25 gauge, 100=£4.81; 200=£9.57.     |                 |
|                                | 1.2mm/30 gauge, 100=£4.81; 200=£9.57      |                 |
| Mendoor Discrete Lancets       | 100=£3.61                                 | £0.04           |
| Microdot                       | 100=£3.00; 200=£6.00                      | £0.04           |
|                                | 200=£10.75.                               |                 |
|                                | 200=£10.75.                               |                 |
|                                | 200=£10.75.                               |                 |
|                                | 200=£10.75.                               |                 |
| Micolet                        | 100=£3.90; 200=£7.44                      | £0.04           |
| Multiclix                      | 204=£9.83                                 | £0.05           |
| Mylife Lancets                 | 200=£5.50                                 | £0.04           |
|                                | 200=£12.00                                |                 |
| Omnican Lance Soft             | 200=£5.45                                 | £0.03           |
| OneTouch                       | 200=£7.63                                 | £0.04           |
|                                | 200=£7.63                                 |                 |
|                                | 100=£3.81                                 |                 |
| palmdoc iCare Advanced Lancets | 100=£2.85; 200=£4.45                      | £0.03           |
| Safe-T-Pro Uno                 | 200=£12.06                                | £0.06           |



| Lancet name                     | MIMS [1] cost information        | Cost per lancet |
|---------------------------------|----------------------------------|-----------------|
| Sarstedt Safety Lancets         | 1.6mm/28 gauge, 200=£10.92.      | £0.05           |
|                                 | 1.6mm/21 gauge, 200=£10.92.      |                 |
|                                 | 1.8mm/18 gauge, 200=£10.92.      |                 |
| Softclix                        | 200=£7.85                        | £0.04           |
|                                 | 50=£1.96                         |                 |
| Sterilance Lite II              | 1.8mm/18 gauge, 100=£5.70.       | £0.06           |
|                                 | 1.8mm/21 gauge, 100=£5.70.       |                 |
|                                 | 1.8mm/26 gauge, 100=£5.70.       |                 |
|                                 | 1.8mm/28 gauge, 100=£5.70.       |                 |
|                                 | 2.4mm/21 gauge, 100=£5.70.       |                 |
|                                 | 2.4mm/26 gauge, 100=£5.70.       |                 |
| SylkFeel Ultra-Thin             | 100=£3.65                        | £0.04           |
| TRUEPlus                        | 0.195mm/33G, 100=£2.90.          | £0.03           |
|                                 | 0.32mm/30G, 100=£2.90            |                 |
| Unilet                          | 100=£3.73; 200=£7.07.            | £0.04           |
|                                 | 100=£2.99                        |                 |
|                                 | 100=£3.80; 200=£7.21.            |                 |
| Unistik 3                       | 50=£3.24; 100=£6.31; 200=£12.34. | £0.06           |
|                                 | 100=£6.31; 200=£12.34.           |                 |
|                                 | 50=£3.24; 100=£6.00; 200=£12.00  |                 |
|                                 | 50=£3.24; 100=£6.31; 200=£12.34  |                 |
| Vitrex Soft                     | 100=£3.00; 200=£5.70             | £0.03           |
| <b>Average cost per lancet:</b> |                                  | <b>£0.04</b>    |

**Table S8: SMBG strip cost**

| SMBG strip name             | MIMS [1] cost information | Cost per SMBG strip |
|-----------------------------|---------------------------|---------------------|
| Active glucose strips       | 50=£9.95                  | £0.20               |
| Advocate Redi-Code+         | 50=£9.95                  | £0.20               |
| Autosense                   | 25=£4.50                  | £0.18               |
| Aviva                       | 50=£15.79                 | £0.32               |
| Betachek G5                 | 50=£14.19.                | £0.28               |
| Betachek Visual             | 50=£6.80.                 | £0.14               |
| BGStar Test Strip           | 50=£14.73.                | £0.29               |
| Breeze 2                    | 5 x 10=£15.00.            | £0.30               |
| CareSens N                  | 50=£12.75                 | £0.26               |
| Compact Test Strips         | 3 x 17=£16.22             | £0.32               |
| Contour Next                | 50=£15.04                 | £0.30               |
| Contour Test Strips         | 50=£9.95.                 | £0.20               |
| Contour TS                  | 50=£9.50.                 | £0.20               |
| Dario Test Strips           | 50=£14.95.                | £0.30               |
| Element Test Strips         | 50=£9.89.                 | £0.20               |
| Fintest Lite                | 50=£7.86                  | £0.16               |
| FreeStyle Lite              | 50=£15.80                 | £0.32               |
| FreeStyle Optium            | 50=£15.71.                | £0.31               |
| FreeStyle Test Strip        | 50=£15.81.                | £0.32               |
| GlucoDock Glucose           | 50=£14.90.                | £0.30               |
| GlucoFlex-R                 | 50=£6.75.                 | £0.14               |
| GlucoLab Test Strips        | 50=£9.89.                 | £0.20               |
| GlucoMen Areo               | 50=£9.95                  | £0.20               |
| GlucoMen GM Sensors         | 50=£9.95                  | £0.20               |
| GlucoMen LX Sensors         | 50=£15.59.                | £0.31               |
| GlucoMen Sensors            | 50=£14.69.                | £0.29               |
| GlucoMen Visio              | 50=£15.60                 | £0.31               |
| GlucNavii                   | 50=£8.95                  | £0.18               |
| GlucRx HCT Glucose          | 50=£13.95                 | £0.28               |
| GlucRx Nexus                | 50=£9.95.                 | £0.20               |
| GlucRx Original             | 50=£9.45.                 | £0.19               |
| GlucZen.auto                | 50=£8.99                  | £0.18               |
| GluNeo                      | 50=£9.89.                 | £0.20               |
| iHealth Test Strips         | 50=£9.49                  | £0.19               |
| IME-DC                      | 50=£14.10.                | £0.28               |
| MediTouch                   | 50=£14.90.                | £2.98               |
| Mendor Discreet             | 2 x 25=£14.75             | £0.30               |
| Microdot+                   | 50=£9.49.                 | £0.19               |
| Mobile Test Cassette        | 100=£32.48                | £0.32               |
| MODZ                        | 50=£14.00                 | £0.28               |
| Myglucohealth               | 50=£15.50.                | £0.31               |
| Mylife Pura                 | 50=£9.50.                 | £0.19               |
| Mylife Unio                 | 50=£9.50                  | £0.19               |
| Omnitest 3                  | 50=£9.89.                 | £0.20               |
| On-Call Advanced            | 50=£13.65                 | £0.27               |
| OneTouch Ultra              | 50=£11.99.                | £0.24               |
| OneTouch Verio              | 50=£15.12.                | £0.30               |
| OneTouch Vita               | 50=£15.07.                | £0.30               |
| palmdoc Icare Advanced      | 50=£9.70                  | £0.19               |
| palmdoc Icare Advanced Solo | 50=£13.50                 | £0.27               |
| Performa                    | 50=£9.95                  | £0.20               |
| SD Codefree                 | 50=£6.99.                 | £0.14               |

| SMBG strip name                                              | MIMS [1] cost information | Cost per SMBG strip |
|--------------------------------------------------------------|---------------------------|---------------------|
| Sensocard                                                    | 50=£16.30.                | £0.33               |
| SuperCheck2                                                  | 50=£8.49.                 | £0.17               |
| SURESIGN Resure                                              | 50=£9.99.                 | £0.20               |
| TEE2                                                         | 50=£7.75.                 | £0.16               |
| TRUEone                                                      | 50=£14.99.                | £0.30               |
| TRUEresult                                                   | 50=£14.99.                | £0.30               |
| TrueTrack Smart System                                       | 50=£14.99.                | £0.30               |
| TRUEyou                                                      | 50=£9.92.                 | £0.20               |
| WaveSense Jazz                                               | 50=£9.87                  | £0.20               |
| <b>Average cost per lancet:</b>                              |                           | <b>£0.04</b>        |
| <i>Abbreviations: SMBG, Self-monitoring of blood glucose</i> |                           |                     |

## References

1. Haymarket Media Group Ltd. Monthly Index of Medical Specialities 2016.  
Available from: <http://www.mims.co.uk/>.
2. National Institute for Health and Care Excellence. NICE guidelines [NG28].  
Type 2 diabetes in adults: management. Appendix F: Full Health Economics  
Report 2015. Available from:  
<https://www.nice.org.uk/guidance/NG28/documents/type-2-diabetes-appendix-f4>.
3. Del Prato S, Camisasca R, Wilson C, Fleck P. Durability of the efficacy and safety of alogliptin compared with glipizide in type 2 diabetes mellitus: a 2-year study. *Diabetes, Obesity & Metabolism*. 2014;16(12):1239-46.
4. Alva ML, Gray A, Mihaylova B, Leal J, Holman RR. The impact of diabetes-related complications on healthcare costs: new results from the UKPDS (UKPDS 84). *Diabetic Medicine*. 2015;32(4):459-66.
5. Currie CJ, Morgan CL, Peters JR. The epidemiology and cost of inpatient care for peripheral vascular disease, infection, neuropathy, and ulceration in diabetes. *Diabetes Care*. 1998;21(1):42-8.
6. Kerr M, Bray B, Medcalf J, O'Donoghue DJ, Matthews B. Estimating the financial cost of chronic kidney disease to the NHS in England. *Nephrology, Dialysis, Transplantation*. 2012;27 Suppl 3:iii73-80.
7. Farmer AJ, Brockbank KJ, Keech ML, England EJ, Deakin CD. Incidence and costs of severe hypoglycaemia requiring attendance by the emergency medical services in South Central England. *Diabetic Medicine*. 2012;29(11):1447-50.

8. UK Prospective Diabetes Study Group. Cost effectiveness analysis of improved blood pressure control in hypertensive patients with type 2 diabetes: UKPDS 40. *BMJ (Clinical Research)*. 1998;317(7160):720-6.
9. Ghatnekar O, Persson U, Willis M, Odegaard K. Cost effectiveness of Becaplermin in the treatment of diabetic foot ulcers in four European countries. *Pharmacoeconomics*. 2001;19(7):767-78.
10. Clarke P, Gray A, Holman R. Estimating utility values for health states of type 2 diabetic patients using the EQ-5D (UKPDS 62). *Medical Decision Making*. 2002;22(4):340-9.
11. Tengs TO, Wallace A. One thousand health-related quality-of-life estimates. *Medical Care*. 2000;38(6):583-637.
12. Wasserfallen JB, Halabi G, Saudan P, Perneger T, Feldman HI, Martin PY, et al. Quality of life on chronic dialysis: comparison between haemodialysis and peritoneal dialysis. *Nephrology, Dialysis, Transplantation*. 2004;19(6):1594-9.
13. Sharma S, Oliver-Fernandez A, Bakal J, Hollands H, Brown GC, Brown MM. Utilities associated with diabetic retinopathy: results from a Canadian sample. *The British Journal of Ophthalmology*. 2003;87(3):259-61.
14. Lloyd A, Nafees B, Gavriel S, Rousculp MD, Boye KS, Ahmad A. Health utility values associated with diabetic retinopathy. *Diabetic Medicine*. 2008;25(5):618-24.
15. Hopkins RB, Tarride JE, Bowen J, Blackhouse G, O'Reilly D, Campbell K, et al. Cost-effectiveness of reducing wait times for cataract surgery in Ontario. *Canadian Journal of Ophthalmology Journal Canadien D'ophtalmologie*. 2008;43(2):213-7.

16. Redekop WK, Stolk EA, Kok E, Lovas K, Kalo Z, Busschbach JJ. Diabetic foot ulcers and amputations: estimates of health utility for use in cost-effectiveness analyses of new treatments. *Diabetes & Metabolism*. 2004;30(6):549-56.
17. Currie CJ, Morgan CL, Poole CD, Sharplin P, Lammert M, McEwan P. Multivariate models of health-related utility and the fear of hypoglycaemia in people with diabetes. *Current Medical Research and Opinion*. 2006;22(8):1523-34.
18. Goldney RD, Phillips PJ, Fisher LJ, Wilson DH. Diabetes, depression, and quality of life: a population study. *Diabetes Care*. 2004;27(5):1066-70.
